# Supplementary material
Source: publisher figshare collection journal article supplement (https://acs.figshare.com/ndownloader/files/3926341)
Supplement: Supplementary file 1 [file 3926341]

 
data_MOSC-II-tOc-Ni 
 
_audit_creation_method            SHELXL-97 
_chemical_name_systematic 
; 
 ? 
; 
_chemical_name_common             ? 
_chemical_melting_point           ? 
_chemical_formula_moiety          'C432 H516 Ni24 O126 S24' 
_chemical_formula_sum 
 'C432 H516 Ni24 O126 S24' 
_chemical_formula_weight          9902.93 
 
loop_ 
 _atom_type_symbol 
 _atom_type_description 
 _atom_type_scat_dispersion_real 
 _atom_type_scat_dispersion_imag 
 _atom_type_scat_source 
 'C'  'C'   0.0033   0.0016 
 'International Tables Vol C Tables 4.2.6.8 and 6.1.1.4' 
 'H'  'H'   0.0000   0.0000 
 'International Tables Vol C Tables 4.2.6.8 and 6.1.1.4' 
 'O'  'O'   0.0106   0.0060 
 'International Tables Vol C Tables 4.2.6.8 and 6.1.1.4' 
 'S'  'S'   0.1246   0.1234 
 'International Tables Vol C Tables 4.2.6.8 and 6.1.1.4' 
 'Ni'  'Ni'   0.3393   1.1124 
 'International Tables Vol C Tables 4.2.6.8 and 6.1.1.4' 
 
_symmetry_cell_setting            Tetragonal 
_symmetry_space_group_name_H-M    I4/m
_symmetry_space_group_name_Hall   '-I 4'
 
loop_ 
 _symmetry_equiv_pos_as_xyz 
 'x, y, z' 
 '-y, x, z' 
 '-x, -y, z' 
 'y, -x, z' 
 'x+1/2, y+1/2, z+1/2' 
 '-y+1/2, x+1/2, z+1/2' 
 '-x+1/2, -y+1/2, z+1/2' 
 'y+1/2, -x+1/2, z+1/2' 
 '-x, -y, -z' 
 'y, -x, -z' 
 'x, y, -z' 
 '-y, x, -z' 
 '-x+1/2, -y+1/2, -z+1/2' 
 'y+1/2, -x+1/2, -z+1/2' 
 'x+1/2, y+1/2, -z+1/2' 
 '-y+1/2, x+1/2, -z+1/2' 
 
_cell_length_a                    29.2376(18) 
_cell_length_b                    29.2376(18) 
_cell_length_c                    42.213(5) 
_cell_angle_alpha                 90.00 
_cell_angle_beta                  90.00 
_cell_angle_gamma                 90.00 
_cell_volume                      36085(5) 
_cell_formula_units_Z             2 
_cell_measurement_temperature     100(2) 
_cell_measurement_reflns_used     9854
_cell_measurement_theta_min       2.17
_cell_measurement_theta_max       18.37
 
_exptl_crystal_description        block 
_exptl_crystal_colour             green
_exptl_crystal_size_max           0.60 
_exptl_crystal_size_mid           0.42 
_exptl_crystal_size_min           0.37 
_exptl_crystal_density_meas       ? 
_exptl_crystal_density_diffrn     0.911 
_exptl_crystal_density_method     'not measured' 
_exptl_crystal_F_000              10344 
_exptl_absorpt_coefficient_mu     0.731 
_exptl_absorpt_correction_type    multi-scan 
_exptl_absorpt_correction_T_min   0.6683 
_exptl_absorpt_correction_T_max   0.7738 
_exptl_absorpt_process_details    SADABS 
 
_exptl_special_details 
; 
 ? 
; 
 
_diffrn_ambient_temperature       100(2) 
_diffrn_radiation_wavelength      0.71073 
_diffrn_radiation_type            MoK\a 
_diffrn_radiation_source          'fine-focus sealed tube' 
_diffrn_radiation_monochromator   graphite 
_diffrn_measurement_device_type   'CCD area detector' 
_diffrn_measurement_method        'phi and omega scans' 
_diffrn_detector_area_resol_mean  ? 
_diffrn_standards_number          ? 
_diffrn_standards_interval_count  ? 
_diffrn_standards_interval_time   ? 
_diffrn_standards_decay_%         ? 
_diffrn_reflns_number             87017 
_diffrn_reflns_av_R_equivalents   0.0611 
_diffrn_reflns_av_sigmaI/netI     0.0268 
_diffrn_reflns_limit_h_min        -25 
_diffrn_reflns_limit_h_max        25 
_diffrn_reflns_limit_k_min        -25 
_diffrn_reflns_limit_k_max        25 
_diffrn_reflns_limit_l_min        -37 
_diffrn_reflns_limit_l_max        37 
_diffrn_reflns_theta_min          1.93 
_diffrn_reflns_theta_max          18.38 
_reflns_number_total              6718 
_reflns_number_gt                 5264 
_reflns_threshold_expression      >2sigma(I) 
 
_computing_data_collection        'Bruker SMART' 
_computing_cell_refinement        'Bruker SMART' 
_computing_data_reduction         'Bruker SAINT' 
_computing_structure_solution     'SHELXS-97 (Sheldrick, 1990)' 
_computing_structure_refinement   'SHELXL-97 (Sheldrick, 1997)' 
_computing_molecular_graphics     'Bruker SHELXTL' 
_computing_publication_material   'Bruker SHELXTL'
 
_refine_special_details 
; 
 Refinement of F^2^ against ALL reflections.  The weighted R-factor wR and 
 goodness of fit S are based on F^2^, conventional R-factors R are based 
 on F, with F set to zero for negative F^2^. The threshold expression of 
 F^2^ > 2sigma(F^2^) is used only for calculating R-factors(gt) etc. and is 
 not relevant to the choice of reflections for refinement.  R-factors based 
 on F^2^ are statistically about twice as large as those based on F, and R- 
 factors based on ALL data will be even larger. 
; 
 
_refine_ls_structure_factor_coef  Fsqd  
_refine_ls_matrix_type            full 
_refine_ls_weighting_scheme       calc  
_refine_ls_weighting_details 
 'calc w=1/[\s^2^(Fo^2^)+(0.2000P)^2^+0.0000P] where P=(Fo^2^+2Fc^2^)/3' 
_atom_sites_solution_primary      direct 
_atom_sites_solution_secondary    difmap 
_atom_sites_solution_hydrogens    geom 
_refine_ls_hydrogen_treatment     constr 
_refine_ls_extinction_method      none 
_refine_ls_extinction_coef        ? 
_refine_ls_number_reflns          6718 
_refine_ls_number_parameters      727 
_refine_ls_number_restraints      277 
_refine_ls_R_factor_all           0.1203 
_refine_ls_R_factor_gt            0.1074 
_refine_ls_wR_factor_ref          0.3423 
_refine_ls_wR_factor_gt           0.3241 
_refine_ls_goodness_of_fit_ref    1.538 
_refine_ls_restrained_S_all       1.559 
_refine_ls_shift/su_max           0.009 
_refine_ls_shift/su_mean          0.000 
 
loop_ 
 _atom_site_label 
 _atom_site_type_symbol 
 _atom_site_fract_x 
 _atom_site_fract_y 
 _atom_site_fract_z 
 _atom_site_U_iso_or_equiv 
 _atom_site_adp_type 
 _atom_site_occupancy 
 _atom_site_symmetry_multiplicity 
 _atom_site_calc_flag 
 _atom_site_refinement_flags 
 _atom_site_disorder_assembly 
 _atom_site_disorder_group 
Ni1 Ni 0.20135(5) 0.40334(5) 0.03513(3) 0.0472(7) Uani 1 1 d . . . 
Ni2 Ni 0.24317(5) 0.31153(5) 0.03524(3) 0.0455(7) Uani 1 1 d . . . 
Ni3 Ni 0.48117(5) 0.43122(5) 0.21496(3) 0.0433(7) Uani 1 1 d . . . 
S1 S 0.10781(13) 0.40910(12) 0.06596(8) 0.0658(11) Uani 1 1 d . . . 
S2 S 0.18469(13) 0.23764(12) 0.06611(7) 0.0655(12) Uani 1 1 d . . . 
S3 S 0.46710(10) 0.36979(10) 0.27225(7) 0.0494(10) Uani 1 1 d . . . 
O1 O 0.2415(3) 0.3664(3) 0.0000 0.048(3) Uani 1 2 d S . . 
O2 O 0.1558(4) 0.4053(3) 0.0000 0.050(3) Uani 1 2 d S . . 
O3 O 0.1509(3) 0.4328(3) 0.06354(18) 0.070(2) Uani 1 1 d . . . 
O4 O 0.0737(3) 0.4317(3) 0.0852(2) 0.083(3) Uani 1 1 d . . . 
O5 O 0.1784(3) 0.3381(2) 0.04673(19) 0.051(2) Uani 1 1 d . . . 
O6 O 0.2314(3) 0.2549(3) 0.06404(16) 0.062(2) Uani 1 1 d . . . 
O7 O 0.1788(3) 0.1973(3) 0.0856(2) 0.077(3) Uani 1 1 d . . . 
O8 O 0.2150(4) 0.2734(4) 0.0000 0.046(3) Uani 1 2 d S . . 
O9 O 0.2234(3) 0.4666(3) 0.0268(2) 0.069(2) Uani 1 1 d . . . 
O10 O 0.2427(3) 0.4093(3) 0.07150(18) 0.055(2) Uani 1 1 d . . . 
O11 O 0.2747(2) 0.3383(3) 0.07199(18) 0.052(2) Uani 1 1 d . . . 
O12 O 0.3053(3) 0.2877(3) 0.02616(19) 0.061(2) Uani 1 1 d . . . 
O13 O 0.5000 0.5000 0.2001(4) 0.059(4) Uani 1 4 d S . . 
O14 O 0.4404(3) 0.4656(2) 0.24537(18) 0.053(2) Uani 1 1 d . . . 
O15 O 0.4686(3) 0.3701(2) 0.23837(18) 0.059(2) Uani 1 1 d . . . 
O16 O 0.4563(3) 0.3273(3) 0.28727(17) 0.059(2) Uani 1 1 d . . . 
O17 O 0.5167(3) 0.3939(3) 0.18489(17) 0.057(2) Uani 1 1 d . . . 
O18 O 0.4296(3) 0.4157(3) 0.18604(18) 0.062(2) Uani 1 1 d . . . 
C1 C 0.1132(6) 0.4036(4) 0.0000 0.032(4) Uani 1 2 d S . . 
C2 C 0.0838(5) 0.4004(4) 0.0286(3) 0.063(4) Uani 1 1 d . . . 
C3 C 0.0377(5) 0.3922(5) 0.0275(3) 0.089(5) Uani 1 1 d . . . 
H3A H 0.0212 0.3904 0.0469 0.107 Uiso 1 1 calc R . . 
C4 C 0.0148(5) 0.3867(7) 0.0000 0.081(6) Uani 1 2 d SD . . 
C5 C -0.0365(8) 0.3748(11) 0.0000 0.286(11) Uani 1 2 d SDU . . 
C6 C -0.0492(8) 0.3455(10) -0.0297(6) 0.262(11) Uani 1 1 d DU . . 
H6A H -0.0818 0.3379 -0.0291 0.392 Uiso 1 1 calc R . . 
H6B H -0.0312 0.3172 -0.0296 0.392 Uiso 1 1 calc R . . 
H6C H -0.0424 0.3629 -0.0490 0.392 Uiso 1 1 calc R . . 
C7 C -0.0651(8) 0.4190(10) 0.0000 0.301(11) Uani 1 2 d SDU . . 
H7A H -0.0553 0.4361 -0.0182 0.361 Uiso 1 1 d R . . 
C8 C -0.1187(9) 0.4213(12) 0.0000 0.307(11) Uani 1 2 d SDU . . 
C9 C -0.1387(13) 0.3714(13) 0.0000 0.311(13) Uani 1 2 d SDU . . 
H9A H -0.1294 0.3549 0.0185 0.467 Uiso 1 1 d R . . 
H9B H -0.1712 0.3747 0.0000 0.467 Uiso 1 2 d SR . . 
C10 C -0.1299(11) 0.4399(12) -0.0354(6) 0.323(12) Uani 1 1 d DU . . 
H10A H -0.1175 0.4186 -0.0511 0.484 Uiso 1 1 calc R . . 
H10B H -0.1159 0.4701 -0.0383 0.484 Uiso 1 1 calc R . . 
H10C H -0.1631 0.4424 -0.0381 0.484 Uiso 1 1 calc R . . 
C11 C 0.1492(4) 0.3252(4) 0.0680(3) 0.049(3) Uani 1 1 d . . . 
C12 C 0.1163(5) 0.3540(5) 0.0810(3) 0.059(3) Uani 1 1 d . . . 
C13 C 0.0859(5) 0.3409(5) 0.1044(4) 0.096(5) Uani 1 1 d . . . 
H13 H 0.0635 0.3617 0.1122 0.115 Uiso 1 1 calc R . . 
C14 C 0.0891(5) 0.2946(6) 0.1170(3) 0.089(5) Uani 1 1 d DU . . 
C15 C 0.1209(5) 0.2677(5) 0.1055(3) 0.077(4) Uani 1 1 d . . . 
H15A H 0.1241 0.2381 0.1145 0.092 Uiso 1 1 calc R . . 
C16 C 0.1502(4) 0.2797(4) 0.0809(3) 0.055(3) Uani 1 1 d . . . 
C17 C 0.0499(8) 0.2799(10) 0.1399(5) 0.221(7) Uani 1 1 d DU . . 
C18 C 0.0456(8) 0.2297(8) 0.1441(6) 0.187(7) Uani 1 1 d U . . 
H18A H 0.0717 0.2183 0.1563 0.281 Uiso 1 1 calc R . . 
H18B H 0.0450 0.2149 0.1233 0.281 Uiso 1 1 calc R . . 
H18C H 0.0172 0.2229 0.1555 0.281 Uiso 1 1 calc R . . 
C19 C -0.0027(9) 0.2877(10) 0.1180(6) 0.235(11) Uani 1 1 d U . . 
H19A H -0.0064 0.3202 0.1128 0.352 Uiso 1 1 calc R . . 
H19B H -0.0286 0.2775 0.1310 0.352 Uiso 1 1 calc R . . 
H19C H -0.0015 0.2698 0.0985 0.352 Uiso 1 1 calc R . . 
C20 C 0.0517(7) 0.3134(9) 0.1691(5) 0.242(7) Uani 1 1 d DU . . 
H20A H 0.0263 0.3056 0.1836 0.290 Uiso 1 1 calc R . . 
H20B H 0.0464 0.3449 0.1614 0.290 Uiso 1 1 calc R . . 
C21 C 0.0981(8) 0.3127(8) 0.1887(5) 0.256(8) Uani 1 1 d DU . . 
C22 C 0.1334(10) 0.3451(9) 0.1743(6) 0.32(2) Uani 1 1 d D . . 
H22A H 0.1380 0.3373 0.1519 0.473 Uiso 1 1 calc R . . 
H22B H 0.1624 0.3421 0.1857 0.473 Uiso 1 1 calc R . . 
H22C H 0.1223 0.3766 0.1759 0.473 Uiso 1 1 calc R . . 
C23 C 0.1164(11) 0.2620(7) 0.1890(8) 0.43(4) Uani 1 1 d D . . 
H23A H 0.1238 0.2525 0.1673 0.646 Uiso 1 1 calc R . . 
H23B H 0.0929 0.2417 0.1977 0.646 Uiso 1 1 calc R . . 
H23C H 0.1440 0.2602 0.2021 0.646 Uiso 1 1 calc R . . 
C24 C 0.0864(10) 0.3280(10) 0.2233(5) 0.288(10) Uani 1 1 d DU . . 
H24A H 0.1144 0.3284 0.2361 0.432 Uiso 1 1 calc R . . 
H24B H 0.0645 0.3065 0.2326 0.432 Uiso 1 1 calc R . . 
H24C H 0.0730 0.3588 0.2229 0.432 Uiso 1 1 calc R . . 
C25 C 0.1842(6) 0.2422(5) 0.0000 0.033(4) Uani 1 2 d S . . 
C26 C 0.1655(4) 0.2266(5) 0.0273(3) 0.072(4) Uani 1 1 d . . . 
C27 C 0.1271(6) 0.1955(5) 0.0273(4) 0.096(5) Uani 1 1 d U . . 
H27A H 0.1142 0.1862 0.0469 0.116 Uiso 1 1 calc R . . 
C28 C 0.1090(7) 0.1792(8) 0.0000 0.127(10) Uani 1 2 d SD . . 
C29 C 0.0725(9) 0.1399(8) 0.0000 0.167(12) Uani 1 2 d SDU . . 
C30 C 0.0992(13) 0.0945(9) 0.0139(8) 0.160(17) Uani 0.50 1 d PDU A 1 
H30A H 0.0778 0.0688 0.0151 0.239 Uiso 0.50 1 calc PR A 1 
H30B H 0.1113 0.1012 0.0350 0.239 Uiso 0.50 1 calc PR A 1 
H30C H 0.1245 0.0866 -0.0003 0.239 Uiso 1 2 calc SR A 1 
C31 C 0.0366(9) 0.1507(9) 0.0267(7) 0.278(17) Uani 0.50 1 d PDU A 1 
H31A H 0.0523 0.1471 0.0474 0.334 Uiso 0.50 1 calc PR A 1 
H31B H 0.0126 0.1270 0.0257 0.334 Uiso 0.50 1 calc PR A 1 
C31' C 0.0366(9) 0.1507(9) 0.0267(7) 0.278(17) Uani 0.50 1 d P A 2 
H31C H 0.0511 0.1471 0.0475 0.417 Uiso 0.50 1 calc PR A 2 
H31D H 0.0107 0.1296 0.0250 0.417 Uiso 0.50 1 calc PR A 2 
H31E H 0.0257 0.1823 0.0244 0.417 Uiso 0.50 1 calc PR A 2 
C32 C 0.0118(10) 0.1992(10) 0.0271(7) 0.156(17) Uani 0.50 1 d PD A 1 
C33 C -0.0250(17) 0.198(3) 0.0000 0.83(13) Uani 1 2 d SDU A 1 
H33A H -0.0110 0.1868 -0.0196 1.251 Uiso 0.50 1 calc PR A 1 
H33B H -0.0369 0.2290 -0.0035 1.251 Uiso 0.50 1 calc PR A 1 
H33C H -0.0502 0.1778 0.0061 1.251 Uiso 0.50 1 calc PR A 1 
C34 C 0.048(2) 0.2364(13) 0.019(2) 0.60(11) Uani 0.50 1 d PDU A 1 
H34A H 0.0648 0.2276 -0.0002 0.903 Uiso 1 2 calc SR A 1 
H34B H 0.0698 0.2393 0.0367 0.903 Uiso 0.50 1 calc PR A 1 
H34C H 0.0329 0.2658 0.0156 0.903 Uiso 0.50 1 calc PR A 1 
C35 C 0.2301(6) 0.4844(7) 0.0000 0.061(5) Uani 1 2 d S . . 
C36 C 0.2446(7) 0.5339(8) 0.0000 0.084(6) Uani 1 2 d S . . 
C37 C 0.2532(6) 0.5581(5) 0.0277(3) 0.091(5) Uani 1 1 d . . . 
H37A H 0.2521 0.5428 0.0475 0.109 Uiso 1 1 calc R . . 
C38 C 0.3259(6) 0.2824(5) 0.0000 0.044(4) Uani 1 2 d S . . 
C39 C 0.3719(7) 0.2677(6) 0.0000 0.061(5) Uani 1 2 d S . . 
C40 C 0.3978(5) 0.2628(5) 0.0268(4) 0.080(4) Uani 1 1 d . . . 
H40A H 0.3827 0.2667 0.0465 0.096 Uiso 1 1 calc R . . 
C41 C 0.2699(5) 0.3800(7) 0.0817(3) 0.058(4) Uani 1 1 d . . . 
C42 C 0.3030(5) 0.3935(5) 0.1080(3) 0.061(4) Uani 1 1 d . . . 
C43 C 0.3011(6) 0.4383(8) 0.1180(4) 0.124(6) Uani 1 1 d . . . 
H43A H 0.2797 0.4589 0.1089 0.149 Uiso 1 1 calc R . . 
C44 C 0.3318(6) 0.4535(7) 0.1424(4) 0.126(7) Uani 1 1 d . . . 
H44A H 0.3302 0.4839 0.1503 0.152 Uiso 1 1 calc R . . 
C45 C 0.3635(5) 0.4233(6) 0.1540(3) 0.071(4) Uani 1 1 d . . . 
C46 C 0.3656(5) 0.3806(6) 0.1424(4) 0.099(5) Uani 1 1 d . . . 
H46A H 0.3876 0.3598 0.1504 0.118 Uiso 1 1 calc R . . 
C47 C 0.3364(7) 0.3668(6) 0.1192(4) 0.111(6) Uani 1 1 d . . . 
H47A H 0.3400 0.3371 0.1105 0.133 Uiso 1 1 calc R . . 
C48 C 0.3994(5) 0.4446(6) 0.1768(3) 0.061(4) Uani 1 1 d . . . 
C49 C 0.5170(6) 0.3929(5) 0.2864(3) 0.124(5) Uani 1 1 d DU . . 
C50 C 0.5255(6) 0.3782(5) 0.3176(3) 0.152(6) Uani 1 1 d DU . . 
H50A H 0.5035 0.3597 0.3281 0.182 Uiso 1 1 calc R . . 
C51 C 0.5662(5) 0.3905(4) 0.3338(5) 0.207(11) Uani 1 1 d DU . . 
C52 C 0.5752(7) 0.3728(7) 0.3700(5) 0.28(2) Uani 1 1 d D . . 
C53 C 0.5291(7) 0.3822(10) 0.3870(6) 0.221(12) Uani 1 1 d D . . 
H53A H 0.5038 0.3707 0.3739 0.332 Uiso 1 1 calc R . . 
H53B H 0.5254 0.4152 0.3902 0.332 Uiso 1 1 calc R . . 
H53C H 0.5288 0.3667 0.4075 0.332 Uiso 1 1 calc R . . 
C54 C 0.6154(7) 0.3863(8) 0.3848(5) 0.169(9) Uani 1 1 d D . . 
H54A H 0.6163 0.4198 0.3862 0.254 Uiso 1 1 calc R . . 
H54B H 0.6417 0.3755 0.3724 0.254 Uiso 1 1 calc R . . 
H54C H 0.6166 0.3732 0.4061 0.254 Uiso 1 1 calc R . . 
C55 C 0.5881(7) 0.3172(6) 0.3682(4) 0.172(10) Uani 1 1 d D . . 
H55A H 0.6089 0.3092 0.3858 0.207 Uiso 1 1 calc R . . 
H55B H 0.5598 0.2989 0.3706 0.207 Uiso 1 1 calc R . . 
C56 C 0.6119(7) 0.3047(7) 0.3354(5) 0.234(9) Uani 1 1 d DU . . 
C57 C 0.6035(9) 0.2550(7) 0.3270(7) 0.277(11) Uani 1 1 d DU . . 
H57A H 0.6237 0.2461 0.3095 0.416 Uiso 1 1 calc R . . 
H57B H 0.5716 0.2510 0.3206 0.416 Uiso 1 1 calc R . . 
H57C H 0.6099 0.2358 0.3455 0.416 Uiso 1 1 calc R . . 
C58 C 0.5880(8) 0.3360(10) 0.3089(5) 0.275(11) Uani 1 1 d DU . . 
H58A H 0.5972 0.3254 0.2878 0.412 Uiso 1 1 calc R . . 
H58B H 0.5976 0.3679 0.3117 0.412 Uiso 1 1 calc R . . 
H58C H 0.5547 0.3339 0.3110 0.412 Uiso 1 1 calc R . . 
C59 C 0.6633(6) 0.3174(7) 0.3373(5) 0.199(8) Uani 1 1 d DU . . 
H59A H 0.6804 0.2994 0.3217 0.298 Uiso 1 1 calc R . . 
H59B H 0.6748 0.3106 0.3586 0.298 Uiso 1 1 calc R . . 
H59C H 0.6671 0.3500 0.3329 0.298 Uiso 1 1 calc R . . 
C60 C 0.5484(4) 0.4196(3) 0.2715(3) 0.041(3) Uani 1 1 d D . . 
C61 C 0.5874(5) 0.4311(5) 0.2864(3) 0.122(6) Uani 1 1 d DU . . 
C62 C 0.5982(6) 0.4180(5) 0.3176(3) 0.148(6) Uani 1 1 d DU . . 
H62A H 0.6260 0.4273 0.3274 0.178 Uiso 1 1 calc R . . 
C63 C -0.0128(19) 0.214(2) 0.0587(7) 0.51(8) Uani 0.50 1 d PDU A 1 
H63A H -0.0289 0.2429 0.0554 0.771 Uiso 0.50 1 calc PR A 1 
H63B H 0.0100 0.2176 0.0755 0.771 Uiso 0.50 1 calc PR A 1 
H63C H -0.0349 0.1903 0.0649 0.771 Uiso 0.50 1 calc PR A 1 
 
loop_ 
 _atom_site_aniso_label 
 _atom_site_aniso_U_11 
 _atom_site_aniso_U_22 
 _atom_site_aniso_U_33 
 _atom_site_aniso_U_23 
 _atom_site_aniso_U_13 
 _atom_site_aniso_U_12 
Ni1 0.0450(12) 0.0523(12) 0.0442(12) -0.0001(7) -0.0002(7) -0.0116(8) 
Ni2 0.0436(11) 0.0511(12) 0.0417(12) 0.0002(7) -0.0023(7) -0.0084(7) 
Ni3 0.0537(11) 0.0538(11) 0.0222(11) -0.0025(7) -0.0004(7) 0.0009(7) 
S1 0.059(3) 0.073(3) 0.066(3) 0.0028(19) 0.013(2) -0.001(2) 
S2 0.085(3) 0.063(3) 0.049(2) 0.0034(19) 0.0015(18) -0.017(2) 
S3 0.057(2) 0.049(2) 0.042(2) 0.0008(16) -0.0024(16) -0.0008(15) 
O1 0.051(7) 0.048(7) 0.043(7) 0.000 0.000 -0.005(5) 
O2 0.020(7) 0.069(8) 0.061(8) 0.000 0.000 0.000(5) 
O3 0.079(7) 0.069(6) 0.062(6) -0.006(4) 0.014(5) -0.013(5) 
O4 0.067(6) 0.082(6) 0.100(7) 0.007(5) 0.017(6) 0.004(5) 
O5 0.053(5) 0.053(5) 0.046(5) 0.008(4) -0.003(5) -0.014(4) 
O6 0.071(6) 0.069(6) 0.046(5) 0.009(4) -0.001(4) -0.011(5) 
O7 0.094(7) 0.057(6) 0.081(6) 0.004(5) -0.006(5) -0.019(5) 
O8 0.048(7) 0.054(7) 0.035(7) 0.000 0.000 0.000(7) 
O9 0.071(6) 0.074(6) 0.060(6) -0.006(5) 0.000(5) -0.010(5) 
O10 0.059(6) 0.060(6) 0.047(5) 0.000(4) -0.020(4) -0.010(5) 
O11 0.047(5) 0.051(6) 0.058(6) -0.011(5) -0.005(4) -0.015(4) 
O12 0.044(5) 0.081(6) 0.058(6) 0.001(5) 0.002(5) -0.004(4) 
O13 0.053(6) 0.053(6) 0.073(11) 0.000 0.000 0.000 
O14 0.054(5) 0.061(5) 0.045(5) 0.008(4) 0.012(4) 0.005(4) 
O15 0.074(6) 0.063(5) 0.040(6) 0.000(4) 0.008(4) -0.024(4) 
O16 0.074(6) 0.048(5) 0.055(5) 0.010(4) -0.003(4) 0.000(4) 
O17 0.050(6) 0.084(6) 0.037(5) -0.012(4) 0.008(4) -0.012(5) 
O18 0.066(6) 0.066(6) 0.053(5) -0.017(5) -0.008(5) -0.003(5) 
C1 0.037(12) 0.031(10) 0.029(10) 0.000 0.000 -0.004(8) 
C2 0.044(10) 0.059(9) 0.088(11) -0.003(7) 0.000(8) -0.016(7) 
C3 0.050(12) 0.137(14) 0.079(11) -0.006(9) -0.004(9) -0.012(9) 
C4 0.026(11) 0.123(18) 0.095(18) 0.000 0.000 -0.042(11) 
C5 0.272(15) 0.302(18) 0.283(17) 0.000 0.000 -0.022(11) 
C6 0.204(19) 0.31(2) 0.27(2) 0.005(12) 0.014(15) -0.048(17) 
C7 0.293(14) 0.311(16) 0.299(15) 0.000 0.000 -0.009(10) 
C8 0.300(13) 0.313(13) 0.308(13) 0.000 0.000 0.000(8) 
C9 0.304(15) 0.314(14) 0.316(15) 0.000 0.000 -0.006(9) 
C10 0.319(15) 0.329(15) 0.320(14) 0.011(8) -0.009(8) 0.004(9) 
C11 0.044(8) 0.059(10) 0.045(8) 0.006(8) 0.024(7) -0.024(8) 
C12 0.056(9) 0.088(10) 0.033(7) 0.013(7) 0.005(7) -0.015(9) 
C13 0.062(10) 0.101(13) 0.124(13) 0.013(11) 0.040(10) -0.001(9) 
C14 0.093(8) 0.094(9) 0.082(8) 0.017(7) 0.023(7) -0.015(7) 
C15 0.055(9) 0.075(10) 0.101(12) -0.002(9) 0.028(9) 0.002(8) 
C16 0.065(9) 0.065(10) 0.034(7) 0.011(7) -0.006(7) -0.018(7) 
C17 0.216(11) 0.224(12) 0.222(11) 0.035(10) 0.022(9) -0.022(11) 
C18 0.158(15) 0.218(12) 0.186(16) 0.054(12) 0.032(13) -0.033(14) 
C19 0.20(2) 0.27(3) 0.24(2) 0.09(2) 0.020(16) -0.020(18) 
C20 0.244(9) 0.240(10) 0.241(9) 0.016(7) 0.022(7) -0.012(8) 
C21 0.259(10) 0.261(10) 0.249(10) 0.001(8) 0.008(7) -0.009(8) 
C22 0.52(6) 0.22(3) 0.21(3) -0.01(3) 0.02(4) -0.19(4) 
C23 0.64(9) 0.19(3) 0.46(7) 0.03(4) 0.38(7) 0.00(4) 
C24 0.295(13) 0.302(13) 0.267(11) -0.014(9) 0.007(8) -0.002(9) 
C25 0.031(10) 0.038(10) 0.032(12) 0.000 0.000 -0.019(9) 
C26 0.053(9) 0.101(11) 0.062(9) -0.002(8) -0.002(8) -0.024(8) 
C27 0.099(9) 0.103(9) 0.087(8) -0.004(7) -0.004(7) -0.033(8) 
C28 0.105(19) 0.18(3) 0.095(19) 0.000 0.000 -0.095(18) 
C29 0.165(14) 0.176(15) 0.161(14) 0.000 0.000 0.003(10) 
C30 0.168(18) 0.153(18) 0.157(19) 0.014(10) -0.003(10) -0.006(10) 
C31 0.273(19) 0.288(19) 0.273(19) -0.001(10) 0.010(10) -0.003(10) 
C31' 0.273(19) 0.288(19) 0.273(19) -0.001(10) 0.010(10) -0.003(10) 
C32 0.08(3) 0.14(3) 0.25(4) -0.10(3) 0.03(3) -0.02(2) 
C33 0.83(13) 0.83(13) 0.83(13) 0.000 0.000 0.002(11) 
C34 0.60(11) 0.60(11) 0.60(11) 0.000(11) 0.001(11) -0.001(11) 
C35 0.043(12) 0.076(19) 0.065(18) 0.000 0.000 -0.006(10) 
C36 0.091(16) 0.09(2) 0.077(18) 0.000 0.000 -0.015(13) 
C37 0.172(16) 0.031(10) 0.068(11) 0.016(9) -0.009(10) -0.016(9) 
C38 0.026(14) 0.061(12) 0.046(15) 0.000 0.000 -0.016(9) 
C39 0.030(15) 0.065(13) 0.088(17) 0.000 0.000 0.009(10) 
C40 0.052(12) 0.101(12) 0.086(12) -0.016(9) 0.000(10) 0.032(8) 
C41 0.055(10) 0.088(14) 0.031(9) 0.005(9) -0.003(8) -0.027(10) 
C42 0.062(10) 0.063(11) 0.058(10) -0.021(9) 0.008(9) -0.005(9) 
C43 0.103(14) 0.137(19) 0.132(15) -0.013(14) -0.057(12) 0.033(12) 
C44 0.120(14) 0.123(15) 0.136(15) -0.049(13) -0.091(13) 0.010(13) 
C45 0.076(11) 0.082(12) 0.056(9) 0.007(9) -0.014(8) 0.019(10) 
C46 0.109(13) 0.080(13) 0.107(13) -0.020(10) -0.067(12) 0.019(10) 
C47 0.110(14) 0.117(15) 0.106(14) -0.021(11) -0.063(12) 0.010(13) 
C48 0.057(10) 0.082(12) 0.043(9) -0.009(9) -0.028(7) 0.018(10) 
C49 0.111(10) 0.147(11) 0.112(10) 0.062(9) -0.023(9) -0.014(9) 
C50 0.145(9) 0.175(9) 0.136(9) 0.037(8) -0.024(8) -0.016(8) 
C51 0.196(14) 0.221(14) 0.206(14) -0.007(10) 0.002(10) -0.020(10) 
C52 0.14(3) 0.50(7) 0.19(3) 0.08(4) -0.04(2) -0.08(4) 
C53 0.19(3) 0.31(4) 0.16(2) -0.01(2) 0.04(2) -0.01(3) 
C54 0.17(2) 0.19(2) 0.15(2) 0.036(17) -0.029(17) 0.036(18) 
C55 0.19(2) 0.16(2) 0.17(2) 0.063(17) -0.040(18) 0.049(17) 
C56 0.215(17) 0.24(2) 0.247(19) 0.022(17) 0.026(17) 0.052(19) 
C57 0.26(2) 0.27(2) 0.30(2) -0.03(2) 0.04(2) 0.01(2) 
C58 0.25(2) 0.33(2) 0.25(2) 0.04(2) -0.006(19) 0.05(2) 
C59 0.200(17) 0.188(18) 0.208(19) 0.034(16) 0.051(17) 0.066(17) 
C60 0.049(8) 0.045(7) 0.028(8) 0.012(6) 0.020(7) -0.004(7) 
C61 0.089(10) 0.193(15) 0.084(10) 0.065(10) -0.039(9) -0.069(10) 
C62 0.121(11) 0.221(16) 0.103(10) 0.072(11) -0.029(9) -0.078(11) 
C63 0.51(8) 0.51(8) 0.51(8) 0.001(11) 0.000(11) 0.001(11) 
 
_geom_special_details 
; 
 All esds (except the esd in the dihedral angle between two l.s. planes) 
 are estimated using the full covariance matrix.  The cell esds are taken 
 into account individually in the estimation of esds in distances, angles 
 and torsion angles; correlations between esds in cell parameters are only 
 used when they are defined by crystal symmetry.  An approximate (isotropic) 
 treatment of cell esds is used for estimating esds involving l.s. planes. 
; 
 
loop_ 
 _geom_bond_atom_site_label_1 
 _geom_bond_atom_site_label_2 
 _geom_bond_distance 
 _geom_bond_site_symmetry_2 
 _geom_bond_publ_flag 
Ni1 O10 1.962(8) . ? 
Ni1 O9 1.990(10) . ? 
Ni1 O2 1.994(8) . ? 
Ni1 O5 2.080(8) . ? 
Ni1 O3 2.088(8) . ? 
Ni1 O1 2.177(7) . ? 
Ni1 Ni2 2.950(2) . ? 
Ni1 Ni1 2.966(3) 11 ? 
Ni2 O12 1.983(9) . ? 
Ni2 O11 1.967(8) . ? 
Ni2 O8 2.033(8) . ? 
Ni2 O6 2.083(7) . ? 
Ni2 O5 2.105(8) . ? 
Ni2 O1 2.189(7) . ? 
Ni2 Ni2 2.975(3) 11 ? 
Ni3 O17 1.970(8) . ? 
Ni3 O18 1.992(8) . ? 
Ni3 O14 2.019(8) . ? 
Ni3 O14 2.035(7) 2_655 ? 
Ni3 O15 2.076(7) . ? 
Ni3 O13 2.177(5) . ? 
Ni3 Ni3 2.948(2) 2_655 ? 
Ni3 Ni3 2.948(2) 4_565 ? 
S1 O3 1.440(9) . ? 
S1 O4 1.446(9) . ? 
S1 C2 1.745(13) . ? 
S1 C12 1.749(13) . ? 
S2 O7 1.448(9) . ? 
S2 O6 1.459(8) . ? 
S2 C16 1.708(13) . ? 
S2 C26 1.761(13) . ? 
S3 O15 1.431(8) . ? 
S3 O16 1.429(8) . ? 
S3 C49 1.716(18) . ? 
S3 C61 1.742(15) 4_565 ? 
O1 Ni2 2.189(7) 11 ? 
O1 Ni1 2.177(7) 11 ? 
O2 C1 1.247(17) . ? 
O2 Ni1 1.994(8) 11 ? 
O5 C11 1.295(13) . ? 
O8 C25 1.282(16) . ? 
O8 Ni2 2.033(8) 11 ? 
O9 C35 1.261(11) . ? 
O10 C41 1.245(16) . ? 
O11 C41 1.294(16) . ? 
O12 C38 1.268(10) . ? 
O13 Ni3 2.177(5) 3_665 ? 
O13 Ni3 2.177(5) 4_565 ? 
O13 Ni3 2.177(5) 2_655 ? 
O14 C60 1.323(12) 4_565 ? 
O14 Ni3 2.035(7) 4_565 ? 
O17 C48 1.194(15) 2_655 ? 
O18 C48 1.284(15) . ? 
C1 C2 1.483(15) 11 ? 
C1 C2 1.483(15) . ? 
C2 C3 1.371(18) . ? 
C3 C4 1.350(15) . ? 
C3 H3A 0.9500 . ? 
C4 C3 1.350(15) 11 ? 
C4 C5 1.540(19) . ? 
C5 C6 1.563(15) . ? 
C5 C6 1.563(15) 11 ? 
C5 C7 1.539(18) . ? 
C6 H6A 0.9800 . ? 
C6 H6B 0.9800 . ? 
C6 H6C 0.9800 . ? 
C7 C8 1.568(18) . ? 
C7 H7A 0.9603 . ? 
C8 C9 1.57(2) . ? 
C8 C10 1.623(16) 11 ? 
C8 C10 1.623(16) . ? 
C9 H9A 0.9573 . ? 
C9 H9B 0.9571 . ? 
C10 H10A 0.9800 . ? 
C10 H10B 0.9800 . ? 
C10 H10C 0.9800 . ? 
C11 C12 1.392(16) . ? 
C11 C16 1.437(16) . ? 
C12 C13 1.384(17) . ? 
C13 C14 1.458(19) . ? 
C13 H13 0.9500 . ? 
C14 C15 1.309(18) . ? 
C14 C17 1.561(18) . ? 
C15 C16 1.391(16) . ? 
C15 H15A 0.9500 . ? 
C17 C18 1.48(3) . ? 
C17 C20 1.575(17) . ? 
C17 C19 1.81(3) . ? 
C18 H18A 0.9800 . ? 
C18 H18B 0.9800 . ? 
C18 H18C 0.9800 . ? 
C19 H19A 0.9800 . ? 
C19 H19B 0.9800 . ? 
C19 H19C 0.9800 . ? 
C20 C21 1.590(17) . ? 
C20 H20A 0.9900 . ? 
C20 H20B 0.9900 . ? 
C21 C22 1.524(17) . ? 
C21 C24 1.566(17) . ? 
C21 C23 1.577(18) . ? 
C22 H22A 0.9800 . ? 
C22 H22B 0.9800 . ? 
C22 H22C 0.9800 . ? 
C23 H23A 0.9800 . ? 
C23 H23B 0.9800 . ? 
C23 H23C 0.9800 . ? 
C24 H24A 0.9800 . ? 
C24 H24B 0.9800 . ? 
C24 H24C 0.9800 . ? 
C25 C26 1.356(14) . ? 
C25 C26 1.356(14) 11 ? 
C26 C27 1.44(2) . ? 
C27 C28 1.354(16) . ? 
C27 H27A 0.9500 . ? 
C28 C27 1.354(16) 11 ? 
C28 C29 1.569(18) . ? 
C29 C30 1.65(4) 11 ? 
C29 C30 1.65(4) . ? 
C29 C31 1.572(16) . ? 
C29 C31' 1.572(16) 11 ? 
C29 C31 1.572(16) 11 ? 
C30 H30A 0.9800 . ? 
C30 H30B 0.9800 . ? 
C30 H30C 0.9800 . ? 
C31 C32 1.591(17) . ? 
C31 H31A 0.9900 . ? 
C31 H31B 0.9900 . ? 
C32 C34 1.562(19) . ? 
C32 C33 1.570(19) . ? 
C32 C63 1.577(18) . ? 
C33 H33A 0.9800 . ? 
C33 H33B 0.9800 . ? 
C33 H33C 0.9800 . ? 
C34 H34A 0.9800 . ? 
C34 H34B 0.9800 . ? 
C34 H34C 0.9800 . ? 
C35 O9 1.261(11) 11 ? 
C35 C36 1.51(3) . ? 
C36 C37 1.390(17) . ? 
C36 C37 1.390(17) 11 ? 
C37 C40 1.320(18) 4_565 ? 
C37 H37A 0.9500 . ? 
C38 O12 1.268(10) 11 ? 
C38 C39 1.41(2) . ? 
C39 C40 1.368(15) 11 ? 
C39 C40 1.368(15) . ? 
C40 C37 1.320(18) 2_655 ? 
C40 H40A 0.9500 . ? 
C41 C42 1.527(19) . ? 
C42 C47 1.334(19) . ? 
C42 C43 1.38(2) . ? 
C43 C44 1.44(2) . ? 
C43 H43A 0.9500 . ? 
C44 C45 1.369(19) . ? 
C44 H44A 0.9500 . ? 
C45 C46 1.342(18) . ? 
C45 C48 1.555(19) . ? 
C46 C47 1.359(19) . ? 
C46 H46A 0.9500 . ? 
C47 H47A 0.9500 . ? 
C48 O17 1.194(15) 4_565 ? 
C49 C60 1.359(19) . ? 
C49 C50 1.407(11) . ? 
C50 C51 1.418(12) . ? 
C50 H50A 0.9500 . ? 
C51 C62 1.409(11) . ? 
C51 C52 1.635(18) . ? 
C52 C54 1.39(2) . ? 
C52 C53 1.551(16) . ? 
C52 C55 1.672(15) . ? 
C53 H53A 0.9800 . ? 
C53 H53B 0.9800 . ? 
C53 H53C 0.9800 . ? 
C54 H54A 0.9800 . ? 
C54 H54B 0.9800 . ? 
C54 H54C 0.9800 . ? 
C55 C56 1.590(16) . ? 
C55 H55A 0.9900 . ? 
C55 H55B 0.9900 . ? 
C56 C57 1.516(16) . ? 
C56 C59 1.548(17) . ? 
C56 C58 1.607(17) . ? 
C57 H57A 0.9800 . ? 
C57 H57B 0.9800 . ? 
C57 H57C 0.9800 . ? 
C58 H58A 0.9800 . ? 
C58 H58B 0.9800 . ? 
C58 H58C 0.9800 . ? 
C59 H59A 0.9800 . ? 
C59 H59B 0.9800 . ? 
C59 H59C 0.9800 . ? 
C60 O14 1.323(12) 2_655 ? 
C60 C61 1.345(17) . ? 
C61 C62 1.408(11) . ? 
C61 S3 1.742(15) 2_655 ? 
C62 H62A 0.9500 . ? 
C63 H63A 0.9800 . ? 
C63 H63B 0.9800 . ? 
C63 H63C 0.9800 . ? 
 
loop_ 
 _geom_angle_atom_site_label_1 
 _geom_angle_atom_site_label_2 
 _geom_angle_atom_site_label_3 
 _geom_angle 
 _geom_angle_site_symmetry_1 
 _geom_angle_site_symmetry_3 
 _geom_angle_publ_flag 
O10 Ni1 O9 81.7(4) . . ? 
O10 Ni1 O2 172.3(4) . . ? 
O9 Ni1 O2 93.4(4) . . ? 
O10 Ni1 O5 95.5(3) . . ? 
O9 Ni1 O5 176.5(3) . . ? 
O2 Ni1 O5 89.2(4) . . ? 
O10 Ni1 O3 87.1(3) . . ? 
O9 Ni1 O3 87.0(3) . . ? 
O2 Ni1 O3 86.7(3) . . ? 
O5 Ni1 O3 90.8(3) . . ? 
O10 Ni1 O1 104.2(3) . . ? 
O9 Ni1 O1 99.6(3) . . ? 
O2 Ni1 O1 82.4(3) . . ? 
O5 Ni1 O1 83.1(3) . . ? 
O3 Ni1 O1 167.6(3) . . ? 
O10 Ni1 Ni2 79.9(3) . . ? 
O9 Ni1 Ni2 135.4(2) . . ? 
O2 Ni1 Ni2 107.7(3) . . ? 
O5 Ni1 Ni2 45.5(2) . . ? 
O3 Ni1 Ni2 131.9(2) . . ? 
O1 Ni1 Ni2 47.67(19) . . ? 
O10 Ni1 Ni1 141.5(2) . 11 ? 
O9 Ni1 Ni1 79.8(2) . 11 ? 
O2 Ni1 Ni1 41.9(2) . 11 ? 
O5 Ni1 Ni1 103.6(2) . 11 ? 
O3 Ni1 Ni1 125.1(2) . 11 ? 
O1 Ni1 Ni1 47.07(17) . 11 ? 
Ni2 Ni1 Ni1 90.09(3) . 11 ? 
O12 Ni2 O11 82.1(3) . . ? 
O12 Ni2 O8 92.1(4) . . ? 
O11 Ni2 O8 170.0(4) . . ? 
O12 Ni2 O6 89.1(3) . . ? 
O11 Ni2 O6 86.2(3) . . ? 
O8 Ni2 O6 85.7(3) . . ? 
O12 Ni2 O5 177.4(3) . . ? 
O11 Ni2 O5 95.4(3) . . ? 
O8 Ni2 O5 90.4(3) . . ? 
O6 Ni2 O5 90.6(3) . . ? 
O12 Ni2 O1 98.5(3) . . ? 
O11 Ni2 O1 104.8(3) . . ? 
O8 Ni2 O1 84.0(3) . . ? 
O6 Ni2 O1 167.4(3) . . ? 
O5 Ni2 O1 82.3(3) . . ? 
O12 Ni2 Ni1 134.4(2) . . ? 
O11 Ni2 Ni1 80.4(3) . . ? 
O8 Ni2 Ni1 109.3(3) . . ? 
O6 Ni2 Ni1 131.0(2) . . ? 
O5 Ni2 Ni1 44.8(2) . . ? 
O1 Ni2 Ni1 47.3(2) . . ? 
O12 Ni2 Ni2 78.9(2) . 11 ? 
O11 Ni2 Ni2 142.1(2) . 11 ? 
O8 Ni2 Ni2 43.0(3) . 11 ? 
O6 Ni2 Ni2 125.7(2) . 11 ? 
O5 Ni2 Ni2 103.3(2) . 11 ? 
O1 Ni2 Ni2 47.20(17) . 11 ? 
Ni1 Ni2 Ni2 89.91(3) . 11 ? 
O17 Ni3 O18 83.0(3) . . ? 
O17 Ni3 O14 175.1(3) . . ? 
O18 Ni3 O14 93.2(3) . . ? 
O17 Ni3 O14 94.4(3) . 2_655 ? 
O18 Ni3 O14 174.4(3) . 2_655 ? 
O14 Ni3 O14 89.1(4) . 2_655 ? 
O17 Ni3 O15 85.6(3) . . ? 
O18 Ni3 O15 87.7(3) . . ? 
O14 Ni3 O15 91.2(3) . . ? 
O14 Ni3 O15 87.1(3) 2_655 . ? 
O17 Ni3 O13 101.2(4) . . ? 
O18 Ni3 O13 103.1(4) . . ? 
O14 Ni3 O13 82.7(4) . . ? 
O14 Ni3 O13 82.3(4) 2_655 . ? 
O15 Ni3 O13 167.8(4) . . ? 
O17 Ni3 Ni3 79.4(3) . 2_655 ? 
O18 Ni3 Ni3 140.4(2) . 2_655 ? 
O14 Ni3 Ni3 105.4(2) . 2_655 ? 
O14 Ni3 Ni3 43.1(2) 2_655 2_655 ? 
O15 Ni3 Ni3 125.5(2) . 2_655 ? 
O13 Ni3 Ni3 47.37(11) . 2_655 ? 
O17 Ni3 Ni3 137.9(2) . 4_565 ? 
O18 Ni3 Ni3 79.8(3) . 4_565 ? 
O14 Ni3 Ni3 43.6(2) . 4_565 ? 
O14 Ni3 Ni3 105.3(2) 2_655 4_565 ? 
O15 Ni3 Ni3 131.3(2) . 4_565 ? 
O13 Ni3 Ni3 47.37(11) . 4_565 ? 
Ni3 Ni3 Ni3 90.0 2_655 4_565 ? 
O3 S1 O4 115.0(5) . . ? 
O3 S1 C2 110.9(6) . . ? 
O4 S1 C2 107.2(6) . . ? 
O3 S1 C12 110.1(6) . . ? 
O4 S1 C12 108.4(6) . . ? 
C2 S1 C12 104.5(6) . . ? 
O7 S2 O6 115.3(5) . . ? 
O7 S2 C16 107.9(6) . . ? 
O6 S2 C16 108.9(6) . . ? 
O7 S2 C26 109.9(6) . . ? 
O6 S2 C26 107.9(6) . . ? 
C16 S2 C26 106.5(6) . . ? 
O15 S3 O16 117.1(4) . . ? 
O15 S3 C49 108.7(6) . . ? 
O16 S3 C49 112.0(6) . . ? 
O15 S3 C61 110.9(6) . 4_565 ? 
O16 S3 C61 109.8(6) . 4_565 ? 
C49 S3 C61 96.4(6) . 4_565 ? 
Ni2 O1 Ni2 85.6(3) 11 . ? 
Ni2 O1 Ni1 147.0(5) 11 . ? 
Ni2 O1 Ni1 85.00(14) . . ? 
Ni2 O1 Ni1 85.00(14) 11 11 ? 
Ni2 O1 Ni1 147.0(5) . 11 ? 
Ni1 O1 Ni1 85.9(3) . 11 ? 
C1 O2 Ni1 131.8(3) . 11 ? 
C1 O2 Ni1 131.8(3) . . ? 
Ni1 O2 Ni1 96.1(5) 11 . ? 
S1 O3 Ni1 117.5(5) . . ? 
C11 O5 Ni1 130.1(7) . . ? 
C11 O5 Ni2 130.1(7) . . ? 
Ni1 O5 Ni2 89.6(3) . . ? 
S2 O6 Ni2 117.7(5) . . ? 
C25 O8 Ni2 132.4(3) . . ? 
C25 O8 Ni2 132.4(3) . 11 ? 
Ni2 O8 Ni2 94.0(5) . 11 ? 
C35 O9 Ni1 126.3(11) . . ? 
C41 O10 Ni1 127.0(8) . . ? 
C41 O11 Ni2 125.0(8) . . ? 
C38 O12 Ni2 130.3(9) . . ? 
Ni3 O13 Ni3 85.3(2) 3_665 4_565 ? 
Ni3 O13 Ni3 85.3(2) 3_665 2_655 ? 
Ni3 O13 Ni3 146.6(8) 4_565 2_655 ? 
Ni3 O13 Ni3 146.6(8) 3_665 . ? 
Ni3 O13 Ni3 85.3(2) 4_565 . ? 
Ni3 O13 Ni3 85.3(2) 2_655 . ? 
C60 O14 Ni3 130.3(7) 4_565 . ? 
C60 O14 Ni3 134.5(7) 4_565 4_565 ? 
Ni3 O14 Ni3 93.3(3) . 4_565 ? 
S3 O15 Ni3 119.1(4) . . ? 
C48 O17 Ni3 127.5(8) 2_655 . ? 
C48 O18 Ni3 123.8(8) . . ? 
O2 C1 C2 125.5(8) . 11 ? 
O2 C1 C2 125.5(8) . . ? 
C2 C1 C2 108.8(15) 11 . ? 
C3 C2 C1 123.6(12) . . ? 
C3 C2 S1 116.7(10) . . ? 
C1 C2 S1 119.6(10) . . ? 
C4 C3 C2 122.4(13) . . ? 
C4 C3 H3A 118.8 . . ? 
C2 C3 H3A 118.8 . . ? 
C3 C4 C3 118.8(16) . 11 ? 
C3 C4 C5 120.6(8) . . ? 
C3 C4 C5 120.6(8) 11 . ? 
C6 C5 C6 107(3) . 11 ? 
C6 C5 C4 110.8(12) . . ? 
C6 C5 C4 110.8(12) 11 . ? 
C6 C5 C7 109.3(12) . . ? 
C6 C5 C7 109.3(12) 11 . ? 
C4 C5 C7 109.9(18) . . ? 
C5 C6 H6A 109.5 . . ? 
C5 C6 H6B 109.5 . . ? 
H6A C6 H6B 109.5 . . ? 
C5 C6 H6C 109.5 . . ? 
H6A C6 H6C 109.5 . . ? 
H6B C6 H6C 109.5 . . ? 
C5 C7 C8 125.5(17) . . ? 
C5 C7 H7A 106.0 . . ? 
C8 C7 H7A 106.0 . . ? 
C7 C8 C9 109.3(16) . . ? 
C7 C8 C10 102.5(12) . 11 ? 
C9 C8 C10 103.7(13) . 11 ? 
C7 C8 C10 102.5(12) . . ? 
C9 C8 C10 103.7(13) . . ? 
C10 C8 C10 134(3) 11 . ? 
C8 C9 H9A 111.2 . . ? 
C8 C9 H9B 106.0 . . ? 
H9A C9 H9B 109.4 . . ? 
C8 C10 H10A 109.5 . . ? 
C8 C10 H10B 109.5 . . ? 
H10A C10 H10B 109.5 . . ? 
C8 C10 H10C 109.5 . . ? 
H10A C10 H10C 109.5 . . ? 
H10B C10 H10C 109.5 . . ? 
O5 C11 C12 123.5(11) . . ? 
O5 C11 C16 121.3(12) . . ? 
C12 C11 C16 115.2(11) . . ? 
C11 C12 C13 123.9(12) . . ? 
C11 C12 S1 120.9(10) . . ? 
C13 C12 S1 115.0(12) . . ? 
C14 C13 C12 118.4(13) . . ? 
C14 C13 H13 120.8 . . ? 
C12 C13 H13 120.8 . . ? 
C15 C14 C13 117.9(13) . . ? 
C15 C14 C17 125.9(18) . . ? 
C13 C14 C17 115.7(17) . . ? 
C14 C15 C16 124.3(14) . . ? 
C14 C15 H15A 117.9 . . ? 
C16 C15 H15A 117.9 . . ? 
C15 C16 C11 120.2(12) . . ? 
C15 C16 S2 117.1(10) . . ? 
C11 C16 S2 122.7(10) . . ? 
C18 C17 C20 122(2) . . ? 
C18 C17 C14 114(2) . . ? 
C20 C17 C14 106.9(14) . . ? 
C18 C17 C19 96.5(18) . . ? 
C20 C17 C19 110(2) . . ? 
C14 C17 C19 105.7(17) . . ? 
C17 C18 H18A 109.5 . . ? 
C17 C18 H18B 109.5 . . ? 
H18A C18 H18B 109.5 . . ? 
C17 C18 H18C 109.5 . . ? 
H18A C18 H18C 109.5 . . ? 
H18B C18 H18C 109.5 . . ? 
C17 C19 H19A 109.5 . . ? 
C17 C19 H19B 109.5 . . ? 
H19A C19 H19B 109.5 . . ? 
C17 C19 H19C 109.5 . . ? 
H19A C19 H19C 109.5 . . ? 
H19B C19 H19C 109.5 . . ? 
C17 C20 C21 115.3(15) . . ? 
C17 C20 H20A 108.5 . . ? 
C21 C20 H20A 108.5 . . ? 
C17 C20 H20B 108.5 . . ? 
C21 C20 H20B 108.5 . . ? 
H20A C20 H20B 107.5 . . ? 
C22 C21 C24 110.1(14) . . ? 
C22 C21 C23 110.9(15) . . ? 
C24 C21 C23 109.6(15) . . ? 
C22 C21 C20 111.2(15) . . ? 
C24 C21 C20 107.1(14) . . ? 
C23 C21 C20 107.7(14) . . ? 
C21 C22 H22A 109.5 . . ? 
C21 C22 H22B 109.5 . . ? 
H22A C22 H22B 109.5 . . ? 
C21 C22 H22C 109.5 . . ? 
H22A C22 H22C 109.5 . . ? 
H22B C22 H22C 109.5 . . ? 
C21 C23 H23A 109.5 . . ? 
C21 C23 H23B 109.5 . . ? 
H23A C23 H23B 109.5 . . ? 
C21 C23 H23C 109.5 . . ? 
H23A C23 H23C 109.5 . . ? 
H23B C23 H23C 109.5 . . ? 
C21 C24 H24A 109.5 . . ? 
C21 C24 H24B 109.5 . . ? 
H24A C24 H24B 109.5 . . ? 
C21 C24 H24C 109.5 . . ? 
H24A C24 H24C 109.5 . . ? 
H24B C24 H24C 109.5 . . ? 
O8 C25 C26 121.6(8) . . ? 
O8 C25 C26 121.6(8) . 11 ? 
C26 C25 C26 116.6(16) . 11 ? 
C25 C26 C27 121.6(13) . . ? 
C25 C26 S2 126.9(10) . . ? 
C27 C26 S2 111.4(10) . . ? 
C28 C27 C26 121.7(14) . . ? 
C28 C27 H27A 119.1 . . ? 
C26 C27 H27A 119.1 . . ? 
C27 C28 C27 116.6(18) 11 . ? 
C27 C28 C29 121.6(9) 11 . ? 
C27 C28 C29 121.6(9) . . ? 
C30 C29 C30 42(3) 11 . ? 
C30 C29 C31 137.2(19) 11 . ? 
C30 C29 C31 102.9(17) . . ? 
C30 C29 C31' 102.9(17) 11 11 ? 
C30 C29 C31' 137.2(19) . 11 ? 
C31 C29 C31' 92(3) . 11 ? 
C30 C29 C31 102.9(17) 11 11 ? 
C30 C29 C31 137.2(19) . 11 ? 
C31 C29 C31 92(3) . 11 ? 
C31' C29 C31 0(3) 11 11 ? 
C30 C29 C28 105.4(18) 11 . ? 
C30 C29 C28 105.4(18) . . ? 
C31 C29 C28 107.9(14) . . ? 
C31' C29 C28 107.9(14) 11 . ? 
C31 C29 C28 107.9(14) 11 . ? 
C29 C30 H30A 109.5 . . ? 
C29 C30 H30B 109.5 . . ? 
H30A C30 H30B 109.5 . . ? 
C29 C30 H30C 109.5 . . ? 
H30A C30 H30C 109.5 . . ? 
H30B C30 H30C 109.5 . . ? 
C29 C31 C32 119.4(16) . . ? 
C29 C31 H31A 107.5 . . ? 
C32 C31 H31A 107.5 . . ? 
C29 C31 H31B 107.5 . . ? 
C32 C31 H31B 107.5 . . ? 
H31A C31 H31B 107.0 . . ? 
C34 C32 C33 108.8(17) . . ? 
C34 C32 C63 107.7(16) . . ? 
C33 C32 C63 108.0(15) . . ? 
C34 C32 C31 107.9(15) . . ? 
C33 C32 C31 106.8(15) . . ? 
C63 C32 C31 117.3(17) . . ? 
C32 C33 H33A 109.5 . . ? 
C32 C33 H33B 109.5 . . ? 
H33A C33 H33B 109.5 . . ? 
C32 C33 H33C 109.5 . . ? 
H33A C33 H33C 109.5 . . ? 
H33B C33 H33C 109.5 . . ? 
C32 C34 H34A 109.5 . . ? 
C32 C34 H34B 109.5 . . ? 
H34A C34 H34B 109.5 . . ? 
C32 C34 H34C 109.5 . . ? 
H34A C34 H34C 109.5 . . ? 
H34B C34 H34C 109.5 . . ? 
O9 C35 O9 127.7(19) 11 . ? 
O9 C35 C36 116.1(9) 11 . ? 
O9 C35 C36 116.1(9) . . ? 
C37 C36 C37 115(2) . 11 ? 
C37 C36 C35 122.6(10) . . ? 
C37 C36 C35 122.6(10) 11 . ? 
C40 C37 C36 120.7(15) 4_565 . ? 
C40 C37 H37A 119.6 4_565 . ? 
C36 C37 H37A 119.6 . . ? 
O12 C38 O12 121.2(16) . 11 ? 
O12 C38 C39 119.3(8) . . ? 
O12 C38 C39 119.3(8) 11 . ? 
C40 C39 C40 111.4(17) 11 . ? 
C40 C39 C38 124.0(9) 11 . ? 
C40 C39 C38 124.0(9) . . ? 
C37 C40 C39 126.0(14) 2_655 . ? 
C37 C40 H40A 117.0 2_655 . ? 
C39 C40 H40A 117.0 . . ? 
O10 C41 O11 127.5(11) . . ? 
O10 C41 C42 118.6(15) . . ? 
O11 C41 C42 113.9(15) . . ? 
C47 C42 C43 118.5(14) . . ? 
C47 C42 C41 124.7(15) . . ? 
C43 C42 C41 116.3(16) . . ? 
C42 C43 C44 119.3(15) . . ? 
C42 C43 H43A 120.3 . . ? 
C44 C43 H43A 120.3 . . ? 
C45 C44 C43 118.4(16) . . ? 
C45 C44 H44A 120.8 . . ? 
C43 C44 H44A 120.8 . . ? 
C44 C45 C46 120.1(14) . . ? 
C44 C45 C48 114.7(15) . . ? 
C46 C45 C48 124.6(14) . . ? 
C45 C46 C47 120.7(15) . . ? 
C45 C46 H46A 119.6 . . ? 
C47 C46 H46A 119.6 . . ? 
C42 C47 C46 122.6(16) . . ? 
C42 C47 H47A 118.7 . . ? 
C46 C47 H47A 118.7 . . ? 
O17 C48 O18 129.1(12) 4_565 . ? 
O17 C48 C45 117.8(13) 4_565 . ? 
O18 C48 C45 112.9(14) . . ? 
C60 C49 C50 119.3(16) . . ? 
C60 C49 S3 129.7(11) . . ? 
C50 C49 S3 110.9(14) . . ? 
C49 C50 C51 121.4(18) . . ? 
C49 C50 H50A 119.3 . . ? 
C51 C50 H50A 119.3 . . ? 
C62 C51 C50 118.0(18) . . ? 
C62 C51 C52 121.8(10) . . ? 
C50 C51 C52 120.3(10) . . ? 
C54 C52 C53 118.5(18) . . ? 
C54 C52 C51 117.8(14) . . ? 
C53 C52 C51 103.7(14) . . ? 
C54 C52 C55 96.1(17) . . ? 
C53 C52 C55 113.0(17) . . ? 
C51 C52 C55 107.5(10) . . ? 
C52 C53 H53A 109.5 . . ? 
C52 C53 H53B 109.5 . . ? 
H53A C53 H53B 109.5 . . ? 
C52 C53 H53C 109.5 . . ? 
H53A C53 H53C 109.5 . . ? 
H53B C53 H53C 109.5 . . ? 
C52 C54 H54A 109.5 . . ? 
C52 C54 H54B 109.5 . . ? 
H54A C54 H54B 109.5 . . ? 
C52 C54 H54C 109.5 . . ? 
H54A C54 H54C 109.5 . . ? 
H54B C54 H54C 109.5 . . ? 
C56 C55 C52 111.2(11) . . ? 
C56 C55 H55A 109.4 . . ? 
C52 C55 H55A 109.4 . . ? 
C56 C55 H55B 109.4 . . ? 
C52 C55 H55B 109.4 . . ? 
H55A C55 H55B 108.0 . . ? 
C57 C56 C59 113.4(14) . . ? 
C57 C56 C55 110.5(15) . . ? 
C59 C56 C55 109.0(14) . . ? 
C57 C56 C58 108.3(15) . . ? 
C59 C56 C58 108.8(14) . . ? 
C55 C56 C58 106.6(12) . . ? 
C56 C57 H57A 109.5 . . ? 
C56 C57 H57B 109.5 . . ? 
H57A C57 H57B 109.5 . . ? 
C56 C57 H57C 109.5 . . ? 
H57A C57 H57C 109.5 . . ? 
H57B C57 H57C 109.5 . . ? 
C56 C58 H58A 109.5 . . ? 
C56 C58 H58B 109.5 . . ? 
H58A C58 H58B 109.5 . . ? 
C56 C58 H58C 109.5 . . ? 
H58A C58 H58C 109.5 . . ? 
H58B C58 H58C 109.5 . . ? 
C56 C59 H59A 109.5 . . ? 
C56 C59 H59B 109.5 . . ? 
H59A C59 H59B 109.5 . . ? 
C56 C59 H59C 109.5 . . ? 
H59A C59 H59C 109.5 . . ? 
H59B C59 H59C 109.5 . . ? 
O14 C60 C49 116.2(11) 2_655 . ? 
O14 C60 C61 122.5(10) 2_655 . ? 
C49 C60 C61 119.8(12) . . ? 
C60 C61 C62 124.2(13) . . ? 
C60 C61 S3 126.8(10) . 2_655 ? 
C62 C61 S3 108.9(11) . 2_655 ? 
C51 C62 C61 117.2(15) . . ? 
C51 C62 H62A 121.4 . . ? 
C61 C62 H62A 121.4 . . ? 
C32 C63 H63A 109.5 . . ? 
C32 C63 H63B 109.5 . . ? 
H63A C63 H63B 109.5 . . ? 
C32 C63 H63C 109.5 . . ? 
H63A C63 H63C 109.5 . . ? 
H63B C63 H63C 109.5 . . ? 

# SQUEEZE RESULTS (APPEND TO CIF)
# Note: Data are Listed for all Voids in the P1 Unit Cell
# i.e. Centre of Gravity, Solvent Accessible Volume,
# Recovered number of Electrons in the Void and
# Details about the Squeezed Material
loop_
  _platon_squeeze_void_nr
  _platon_squeeze_void_average_x
  _platon_squeeze_void_average_y
  _platon_squeeze_void_average_z
  _platon_squeeze_void_volume
  _platon_squeeze_void_count_electrons
  _platon_squeeze_void_content
   1  0.000  0.000  0.000       267        86 ' '
   2  0.501 -0.007 -0.002     17492      3351 ' '
   3  0.694  0.103  0.000        11         1 ' '
   4  0.397  0.194  0.500        11         1 ' '
   5  0.103  0.306  0.000        11         2 ' '
   6  0.806  0.397  0.500        11         2 ' '
   7  0.500  0.500  0.500       267        86 ' '
   8  0.194  0.603  0.500        11         1 ' '
   9  0.897  0.694  0.000        11         1 ' '
  10  0.603  0.806  0.500        11         2 ' '
  11  0.306  0.897  0.000        11         2 ' '
_platon_squeeze_details
;
;
 
_diffrn_measured_fraction_theta_max    0.998 
_diffrn_reflns_theta_full              18.38 
_diffrn_measured_fraction_theta_full   0.998 
_refine_diff_density_max    1.209 
_refine_diff_density_min   -0.916 
_refine_diff_density_rms    0.125 
